# Supplementary material for: Neuropathogenesis of Japanese Encephalitis in a Primate Model
Source: PLOS journal article supplement (doi:10.1371/journal.pntd.0002980), 2014-08-07
Supplement: S1 (10.1371/journal.pntd.0002980.s001) [file journal.pntd.0002980.s001]

Supplemental Material Table S1. Immunostaining of Japanese Encephalitis Virus infected monkey brains.

A. Antibodies and detection methods.

| Antibody (clone)                                      | Source         | Detection method* | Dilution     | Specificity                                                                                      |
|-------------------------------------------------------|----------------|-------------------|--------------|--------------------------------------------------------------------------------------------------|
| Mouse anti-JEV                                        | AFRIMS         | IP&IFA            | 1:2000/1:160 | Japanese encephalitis virus                                                                      |
| Mouse anti-Neuronal Nuclei [NeuN]                     | Chemicon       | IP                | 1:200        | Neurons                                                                                          |
| Rabbit anti-Glial Fibrillary Acidic Protein [GFAP]    | DakoCytomation | IP&IFA            | 1:1000/1:100 | Astrocytes                                                                                       |
| Anti-Human Von Willebrand Factor [Factor VIII]        | DakoCytomation | IP                | 1:1600       | Endothelial cells, megakaryocytes, platelets, serum                                              |
| Rabbit anti-Human CD3                                 | DakoCytomation | IP                | 1:100        | T cells                                                                                          |
| Mouse anti –Human CD20 cy (L26)                       | DakoCytomation | IP                | 1:200        | B cells                                                                                          |
| Mouse anti –Human CD68 (KP1)                          | DakoCytomation | IP                | 1:100        | Macrophages, monocytes, microglial cells                                                         |
| Mouse anti-Human Myeloid/Histiocyte Antigen (MAC 387) | DakoCytomation | IP                | 1:1600       | Monocytes, neutrophils, recently blood derived macrophages, some microglial cells (8,9)          |
| Mouse anti-Human HLA-DR Antigen [MHC II] (TAL.1B5)    | DakoCytomation | IP                | 1:25         | Macrophages, B cells, activated T cells, activated microglial cells, activated endothelial cells |
| Rabbit anti-Human/Mouse Cleaved Caspase-3 [Asp175]    | R & D          | IP                | 1:100        | Cleaved Caspase-3                                                                                |

|                                                              |                             |    |        |                                        |
|--------------------------------------------------------------|-----------------------------|----|--------|----------------------------------------|
| Rabbit Caspase-8 p18 [H-134])                                | Santa Cruz                  | IP | 1:50   | Caspase-8                              |
| Rabbit Caspase-9 p10 [H-83])                                 | Santa Cruz                  | IP | 1:50   | Caspase-9                              |
| Rabbit anti-Human BAX [N-20]                                 | Santa Cruz                  | IP | 1:2000 | Bax $\alpha$ , Bax $\beta$ , Bax       |
| Mouse anti-Human Bcl-2 (100/D5)                              | Novocastra                  | IP | 1:80   | Human bcl-2 oncoprotein                |
| Rabbit anti-Nitric Oxide Synthase [iNOS]                     | Thermo Scientific           | IP | 1:150  | Activated macrophages and glial cells  |
| Rabbit anti-Nitrotyrosine [NT]                               | Chemicon                    | IP | 1:200  | Nitrotyrosine                          |
| Mouse anti-Human Matrix Metalloproteinase [MMP]-2 (A-GeIVC2) | Neo Marker                  | IP | 1:10   | Both pro and active forms of MMP-2     |
| Rabbit anti-Human Matrix Metalloproteinase [MMP]-9           | Neo Marker                  | IP | 1:750  | Both pro and active forms of MMP-9     |
| Rabbit anti-Human Tumor Necrosis Factor [TNF]- $\alpha$      | AbCam                       | IP | 1:1000 | Cell bound pre-cursor of TNF- $\alpha$ |
| Rabbit anti-Human Interferon [IFN]- $\alpha$                 | PBL Biomedical Laboratories | IP | 1:2000 | IFN- $\alpha$                          |

IP = Indirect peroxidase with peroxidase-conjugated anti-mouse or -rabbit antibody (EnVision Systems; Dako, Carpinteria, CA, USA) and diaminobenzidine (DAB, VECTOR, Burlingame, CA, USA), NovaRED (VECTOR) or tetramethylbenzidine (TMB, VECTOR) as substrate

IFA = Indirect immunofluorescence with goat anti-rabbit FITC (kpl, Gaithersburg, MD, USA), sheep anti-mouse IgG FITC conjugate (Sigma,

St. Louis, MO, USA), goat anti-rabbit Texas Red (Molecular Probes, Eugene, OR, USA) or goat anti-mouse Texas Red (Molecular Probes).

\*pre-treated with heat-induced antigen/epitope retrieval (HIER) in citrate buffer pH 6.0 (VECTOR) for all antigens except for Bcl-2 (citrate buffer pH 9.0

#### Sources:

AFRIMS, Armed Forces Research Institute of Medical Sciences, Bangkok, Thailand

Chemicon International, Inc, Temecula, CA, USA

DykoCytomation, Carpinteria, CA, USA

R&D, Minneapolis, MN, USA

Santa Cruz Biotechnology, Santa Cruz, CA, USA

Novocastra, New Castle, UK

Thermo Scientific, Rockford, IL, USA

Neo Marker, Fremont, CA, USA

AbCam, Cambridge, UK

PBL Biomedical Laboratories, Piscataway, NJ, USA

B. Double and sequential immunostaining of Japanese Encephalitis Virus infected monkey brains

| Antibody             |                   | Detection Method<br>(chromogen/fluorochrome) |        |
|----------------------|-------------------|----------------------------------------------|--------|
| First                | Second            | First                                        | Second |
| Double Immunostainng |                   |                                              |        |
| TUNEL                | JEV               | IFA/FITC                                     | IFA/TR |
|                      |                   | IP/DAB                                       | ABC/AP |
|                      | NeuN              | IP/DAB                                       | ABC/AP |
|                      | CD68              | IP/DAB                                       | ABC/AP |
| JEV                  | MAC387            | IP/DAB                                       | ABC/AP |
|                      | GFAP              | IFA/FITC                                     | IFA/TR |
|                      |                   | ABC/AP                                       | IP/DAB |
|                      | IFN- $\alpha$     | ABC/AP                                       | IP/DAB |
|                      | TNF- $\alpha$     | ABC/AP                                       | IP/DAB |
|                      | MMP-9             | ABC/AP                                       | IP/DAB |
|                      | iNOS              | ABC/AP                                       | IP/DAB |
|                      | Cleaved Caspase-3 | ABC/AP                                       | IP/DAB |
|                      | Caspase-8         | ABC/AP                                       | IP/DAB |
|                      | Caspase-9         | ABC/AP                                       | IP/DAB |
| CD68                 | BAX               | ABC/AP                                       | IP/DAB |
|                      | iNOS              | ABC/AP                                       | IP/DAB |

|                                       |               |        |        |
|---------------------------------------|---------------|--------|--------|
|                                       | MMP-9         | ABC/AP | IP/DAB |
|                                       | TNF- $\alpha$ | ABC/AP | IP/DAB |
| <hr/> Sequential Immunostaining <hr/> |               |        |        |
| JEV                                   | CD68          | IP/DAB | IP/DAB |
| TNF- $\alpha$                         | GFAP          | IP/DAB | IP/DAB |
|                                       | CD3           | IP/DAB | IP/DAB |
|                                       | CD68          | IP/DAB | IP/DAB |

---

IP/DAB = Indirect peroxidase with peroxidase-conjugated anti-mouse or -rabbit antibody (EnVision Systems; Dako, Carpinteria, CA) and diaminobenzidine (DAB, VECTOR, Burlingame, CA, USA) or NovaRED (VECTOR) as substrate

ABC/AP = Avidin Biotin Complex – Alkaline Phosphatase with 5-bromo-4-chloro-3-indolyl phosphate/nitroblue tetrazolium (VECTOR Blue) as substrate

IFA/FITC = Indirect immunofluorescence with goat anti-rabbit FITC (kpl, Gaithersburg, MD, USA) or sheep anti-mouse IgG FITC conjugate (Sigma, St. Louis, MO, USA)

IFA/TR = Indirect immunofluorescence with goat anti-rabbit Texas Red (Molecular Probes, Eugene, OR, USA) or goat anti-mouse Texas Red (Molecular Probes).
